# Supplementary material for: Adult-born neurons facilitate olfactory bulb pattern separation during task engagement
Source: eLife journal article supplement (doi:10.7554/elife.33006), 2018-03-13
Supplement: supp [file elife-33006-supp-v1.zip]

Figure 7-figure supplement 1

**A**

Control (n = 12) task    Ablation (n = 10) task    Control (n = 10) passive    Ablation (n = 7) passive

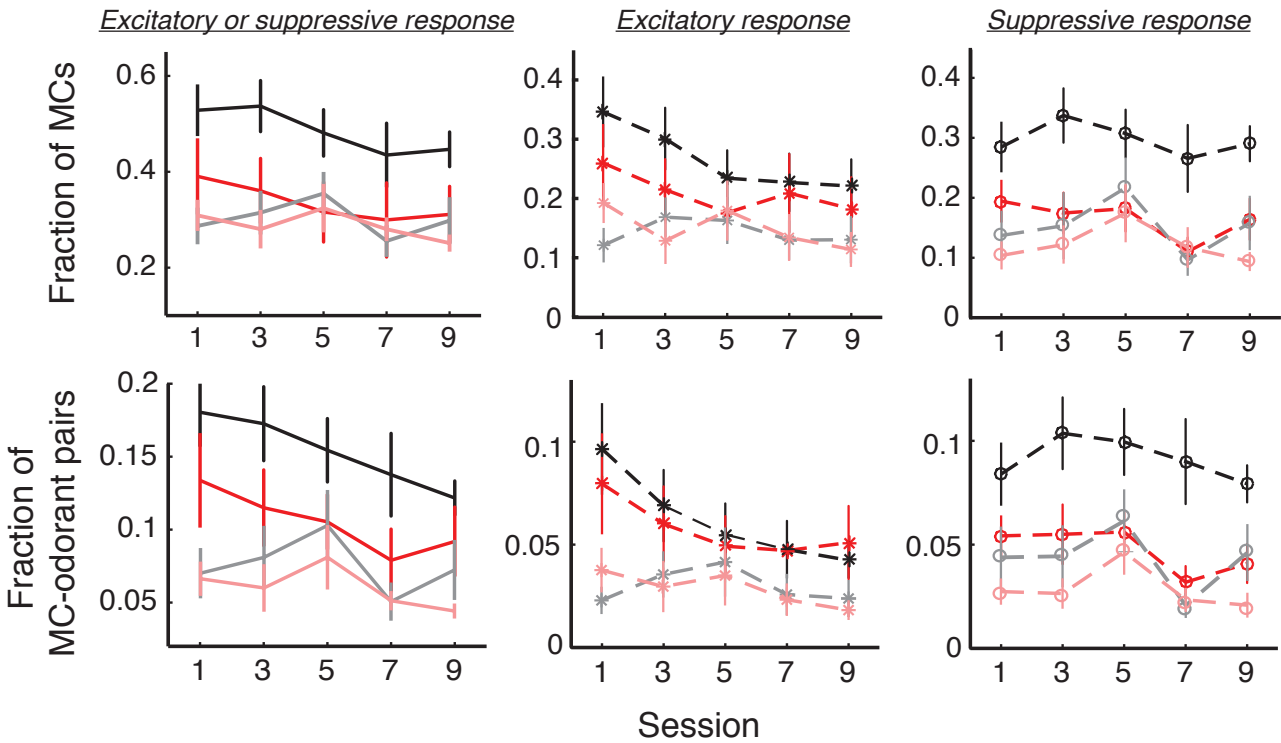

**B**

|                              | <i>Excitatory or suppressive response</i>                                                                                                                                                                                                                                                                                            | <i>Excitatory response</i> | <i>Suppressive response</i> |                 |                  |         |        |         |         |          |  |        |        |                 |  |  |        |                                                                                                                                                                                                                                                                                                                                  |                  |          |                 |                  |         |        |         |        |          |  |        |        |                 |  |  |        |                                                                                                                                                                                                                                                                                                                                          |                  |          |                 |                  |         |         |         |         |          |  |        |        |                 |  |  |        |
|------------------------------|--------------------------------------------------------------------------------------------------------------------------------------------------------------------------------------------------------------------------------------------------------------------------------------------------------------------------------------|----------------------------|-----------------------------|-----------------|------------------|---------|--------|---------|---------|----------|--|--------|--------|-----------------|--|--|--------|----------------------------------------------------------------------------------------------------------------------------------------------------------------------------------------------------------------------------------------------------------------------------------------------------------------------------------|------------------|----------|-----------------|------------------|---------|--------|---------|--------|----------|--|--------|--------|-----------------|--|--|--------|------------------------------------------------------------------------------------------------------------------------------------------------------------------------------------------------------------------------------------------------------------------------------------------------------------------------------------------|------------------|----------|-----------------|------------------|---------|---------|---------|---------|----------|--|--------|--------|-----------------|--|--|--------|
| Fraction of MCs              | <table><tr><th>2-ANOVA p(group)</th><th>Ablation</th><th>Control passive</th><th>Ablation passive</th></tr><tr><td>Control</td><td>0.0002</td><td>&lt;0.0001</td><td>&lt;0.0001</td></tr><tr><td>Ablation</td><td></td><td>0.2592</td><td>0.1519</td></tr><tr><td>Control passive</td><td></td><td></td><td>0.9703</td></tr></table> | 2-ANOVA p(group)           | Ablation                    | Control passive | Ablation passive | Control | 0.0002 | <0.0001 | <0.0001 | Ablation |  | 0.2592 | 0.1519 | Control passive |  |  | 0.9703 | <table><tr><th>2-ANOVA p(group)</th><th>Ablation</th><th>Control passive</th><th>Ablation passive</th></tr><tr><td>Control</td><td>0.1596</td><td>&lt;0.0001</td><td>0.0008</td></tr><tr><td>Ablation</td><td></td><td>0.1345</td><td>0.2915</td></tr><tr><td>Control passive</td><td></td><td></td><td>0.9963</td></tr></table> | 2-ANOVA p(group) | Ablation | Control passive | Ablation passive | Control | 0.1596 | <0.0001 | 0.0008 | Ablation |  | 0.1345 | 0.2915 | Control passive |  |  | 0.9963 | <table><tr><th>2-ANOVA p(group)</th><th>Ablation</th><th>Control passive</th><th>Ablation passive</th></tr><tr><td>Control</td><td>&lt;0.0001</td><td>&lt;0.0001</td><td>&lt;0.0001</td></tr><tr><td>Ablation</td><td></td><td>0.9705</td><td>0.4718</td></tr><tr><td>Control passive</td><td></td><td></td><td>0.7066</td></tr></table> | 2-ANOVA p(group) | Ablation | Control passive | Ablation passive | Control | <0.0001 | <0.0001 | <0.0001 | Ablation |  | 0.9705 | 0.4718 | Control passive |  |  | 0.7066 |
| 2-ANOVA p(group)             | Ablation                                                                                                                                                                                                                                                                                                                             | Control passive            | Ablation passive            |                 |                  |         |        |         |         |          |  |        |        |                 |  |  |        |                                                                                                                                                                                                                                                                                                                                  |                  |          |                 |                  |         |        |         |        |          |  |        |        |                 |  |  |        |                                                                                                                                                                                                                                                                                                                                          |                  |          |                 |                  |         |         |         |         |          |  |        |        |                 |  |  |        |
| Control                      | 0.0002                                                                                                                                                                                                                                                                                                                               | <0.0001                    | <0.0001                     |                 |                  |         |        |         |         |          |  |        |        |                 |  |  |        |                                                                                                                                                                                                                                                                                                                                  |                  |          |                 |                  |         |        |         |        |          |  |        |        |                 |  |  |        |                                                                                                                                                                                                                                                                                                                                          |                  |          |                 |                  |         |         |         |         |          |  |        |        |                 |  |  |        |
| Ablation                     |                                                                                                                                                                                                                                                                                                                                      | 0.2592                     | 0.1519                      |                 |                  |         |        |         |         |          |  |        |        |                 |  |  |        |                                                                                                                                                                                                                                                                                                                                  |                  |          |                 |                  |         |        |         |        |          |  |        |        |                 |  |  |        |                                                                                                                                                                                                                                                                                                                                          |                  |          |                 |                  |         |         |         |         |          |  |        |        |                 |  |  |        |
| Control passive              |                                                                                                                                                                                                                                                                                                                                      |                            | 0.9703                      |                 |                  |         |        |         |         |          |  |        |        |                 |  |  |        |                                                                                                                                                                                                                                                                                                                                  |                  |          |                 |                  |         |        |         |        |          |  |        |        |                 |  |  |        |                                                                                                                                                                                                                                                                                                                                          |                  |          |                 |                  |         |         |         |         |          |  |        |        |                 |  |  |        |
| 2-ANOVA p(group)             | Ablation                                                                                                                                                                                                                                                                                                                             | Control passive            | Ablation passive            |                 |                  |         |        |         |         |          |  |        |        |                 |  |  |        |                                                                                                                                                                                                                                                                                                                                  |                  |          |                 |                  |         |        |         |        |          |  |        |        |                 |  |  |        |                                                                                                                                                                                                                                                                                                                                          |                  |          |                 |                  |         |         |         |         |          |  |        |        |                 |  |  |        |
| Control                      | 0.1596                                                                                                                                                                                                                                                                                                                               | <0.0001                    | 0.0008                      |                 |                  |         |        |         |         |          |  |        |        |                 |  |  |        |                                                                                                                                                                                                                                                                                                                                  |                  |          |                 |                  |         |        |         |        |          |  |        |        |                 |  |  |        |                                                                                                                                                                                                                                                                                                                                          |                  |          |                 |                  |         |         |         |         |          |  |        |        |                 |  |  |        |
| Ablation                     |                                                                                                                                                                                                                                                                                                                                      | 0.1345                     | 0.2915                      |                 |                  |         |        |         |         |          |  |        |        |                 |  |  |        |                                                                                                                                                                                                                                                                                                                                  |                  |          |                 |                  |         |        |         |        |          |  |        |        |                 |  |  |        |                                                                                                                                                                                                                                                                                                                                          |                  |          |                 |                  |         |         |         |         |          |  |        |        |                 |  |  |        |
| Control passive              |                                                                                                                                                                                                                                                                                                                                      |                            | 0.9963                      |                 |                  |         |        |         |         |          |  |        |        |                 |  |  |        |                                                                                                                                                                                                                                                                                                                                  |                  |          |                 |                  |         |        |         |        |          |  |        |        |                 |  |  |        |                                                                                                                                                                                                                                                                                                                                          |                  |          |                 |                  |         |         |         |         |          |  |        |        |                 |  |  |        |
| 2-ANOVA p(group)             | Ablation                                                                                                                                                                                                                                                                                                                             | Control passive            | Ablation passive            |                 |                  |         |        |         |         |          |  |        |        |                 |  |  |        |                                                                                                                                                                                                                                                                                                                                  |                  |          |                 |                  |         |        |         |        |          |  |        |        |                 |  |  |        |                                                                                                                                                                                                                                                                                                                                          |                  |          |                 |                  |         |         |         |         |          |  |        |        |                 |  |  |        |
| Control                      | <0.0001                                                                                                                                                                                                                                                                                                                              | <0.0001                    | <0.0001                     |                 |                  |         |        |         |         |          |  |        |        |                 |  |  |        |                                                                                                                                                                                                                                                                                                                                  |                  |          |                 |                  |         |        |         |        |          |  |        |        |                 |  |  |        |                                                                                                                                                                                                                                                                                                                                          |                  |          |                 |                  |         |         |         |         |          |  |        |        |                 |  |  |        |
| Ablation                     |                                                                                                                                                                                                                                                                                                                                      | 0.9705                     | 0.4718                      |                 |                  |         |        |         |         |          |  |        |        |                 |  |  |        |                                                                                                                                                                                                                                                                                                                                  |                  |          |                 |                  |         |        |         |        |          |  |        |        |                 |  |  |        |                                                                                                                                                                                                                                                                                                                                          |                  |          |                 |                  |         |         |         |         |          |  |        |        |                 |  |  |        |
| Control passive              |                                                                                                                                                                                                                                                                                                                                      |                            | 0.7066                      |                 |                  |         |        |         |         |          |  |        |        |                 |  |  |        |                                                                                                                                                                                                                                                                                                                                  |                  |          |                 |                  |         |        |         |        |          |  |        |        |                 |  |  |        |                                                                                                                                                                                                                                                                                                                                          |                  |          |                 |                  |         |         |         |         |          |  |        |        |                 |  |  |        |
| Fraction of MC-odorant pairs | <table><tr><th>2-ANOVA p(group)</th><th>Ablation</th><th>Control passive</th><th>Ablation passive</th></tr><tr><td>Control</td><td>0.0027</td><td>&lt;0.0001</td><td>&lt;0.0001</td></tr><tr><td>Ablation</td><td></td><td>0.1286</td><td>0.0145</td></tr><tr><td>Control passive</td><td></td><td></td><td>0.7273</td></tr></table> | 2-ANOVA p(group)           | Ablation                    | Control passive | Ablation passive | Control | 0.0027 | <0.0001 | <0.0001 | Ablation |  | 0.1286 | 0.0145 | Control passive |  |  | 0.7273 | <table><tr><th>2-ANOVA p(group)</th><th>Ablation</th><th>Control passive</th><th>Ablation passive</th></tr><tr><td>Control</td><td>0.9331</td><td>0.0019</td><td>0.0044</td></tr><tr><td>Ablation</td><td></td><td>0.0281</td><td>0.0408</td></tr><tr><td>Control passive</td><td></td><td></td><td>0.9995</td></tr></table>     | 2-ANOVA p(group) | Ablation | Control passive | Ablation passive | Control | 0.9331 | 0.0019  | 0.0044 | Ablation |  | 0.0281 | 0.0408 | Control passive |  |  | 0.9995 | <table><tr><th>2-ANOVA p(group)</th><th>Ablation</th><th>Control passive</th><th>Ablation passive</th></tr><tr><td>Control</td><td>&lt;0.0001</td><td>&lt;0.0001</td><td>&lt;0.0001</td></tr><tr><td>Ablation</td><td></td><td>0.9730</td><td>0.2262</td></tr><tr><td>Control passive</td><td></td><td></td><td>0.4015</td></tr></table> | 2-ANOVA p(group) | Ablation | Control passive | Ablation passive | Control | <0.0001 | <0.0001 | <0.0001 | Ablation |  | 0.9730 | 0.2262 | Control passive |  |  | 0.4015 |
| 2-ANOVA p(group)             | Ablation                                                                                                                                                                                                                                                                                                                             | Control passive            | Ablation passive            |                 |                  |         |        |         |         |          |  |        |        |                 |  |  |        |                                                                                                                                                                                                                                                                                                                                  |                  |          |                 |                  |         |        |         |        |          |  |        |        |                 |  |  |        |                                                                                                                                                                                                                                                                                                                                          |                  |          |                 |                  |         |         |         |         |          |  |        |        |                 |  |  |        |
| Control                      | 0.0027                                                                                                                                                                                                                                                                                                                               | <0.0001                    | <0.0001                     |                 |                  |         |        |         |         |          |  |        |        |                 |  |  |        |                                                                                                                                                                                                                                                                                                                                  |                  |          |                 |                  |         |        |         |        |          |  |        |        |                 |  |  |        |                                                                                                                                                                                                                                                                                                                                          |                  |          |                 |                  |         |         |         |         |          |  |        |        |                 |  |  |        |
| Ablation                     |                                                                                                                                                                                                                                                                                                                                      | 0.1286                     | 0.0145                      |                 |                  |         |        |         |         |          |  |        |        |                 |  |  |        |                                                                                                                                                                                                                                                                                                                                  |                  |          |                 |                  |         |        |         |        |          |  |        |        |                 |  |  |        |                                                                                                                                                                                                                                                                                                                                          |                  |          |                 |                  |         |         |         |         |          |  |        |        |                 |  |  |        |
| Control passive              |                                                                                                                                                                                                                                                                                                                                      |                            | 0.7273                      |                 |                  |         |        |         |         |          |  |        |        |                 |  |  |        |                                                                                                                                                                                                                                                                                                                                  |                  |          |                 |                  |         |        |         |        |          |  |        |        |                 |  |  |        |                                                                                                                                                                                                                                                                                                                                          |                  |          |                 |                  |         |         |         |         |          |  |        |        |                 |  |  |        |
| 2-ANOVA p(group)             | Ablation                                                                                                                                                                                                                                                                                                                             | Control passive            | Ablation passive            |                 |                  |         |        |         |         |          |  |        |        |                 |  |  |        |                                                                                                                                                                                                                                                                                                                                  |                  |          |                 |                  |         |        |         |        |          |  |        |        |                 |  |  |        |                                                                                                                                                                                                                                                                                                                                          |                  |          |                 |                  |         |         |         |         |          |  |        |        |                 |  |  |        |
| Control                      | 0.9331                                                                                                                                                                                                                                                                                                                               | 0.0019                     | 0.0044                      |                 |                  |         |        |         |         |          |  |        |        |                 |  |  |        |                                                                                                                                                                                                                                                                                                                                  |                  |          |                 |                  |         |        |         |        |          |  |        |        |                 |  |  |        |                                                                                                                                                                                                                                                                                                                                          |                  |          |                 |                  |         |         |         |         |          |  |        |        |                 |  |  |        |
| Ablation                     |                                                                                                                                                                                                                                                                                                                                      | 0.0281                     | 0.0408                      |                 |                  |         |        |         |         |          |  |        |        |                 |  |  |        |                                                                                                                                                                                                                                                                                                                                  |                  |          |                 |                  |         |        |         |        |          |  |        |        |                 |  |  |        |                                                                                                                                                                                                                                                                                                                                          |                  |          |                 |                  |         |         |         |         |          |  |        |        |                 |  |  |        |
| Control passive              |                                                                                                                                                                                                                                                                                                                                      |                            | 0.9995                      |                 |                  |         |        |         |         |          |  |        |        |                 |  |  |        |                                                                                                                                                                                                                                                                                                                                  |                  |          |                 |                  |         |        |         |        |          |  |        |        |                 |  |  |        |                                                                                                                                                                                                                                                                                                                                          |                  |          |                 |                  |         |         |         |         |          |  |        |        |                 |  |  |        |
| 2-ANOVA p(group)             | Ablation                                                                                                                                                                                                                                                                                                                             | Control passive            | Ablation passive            |                 |                  |         |        |         |         |          |  |        |        |                 |  |  |        |                                                                                                                                                                                                                                                                                                                                  |                  |          |                 |                  |         |        |         |        |          |  |        |        |                 |  |  |        |                                                                                                                                                                                                                                                                                                                                          |                  |          |                 |                  |         |         |         |         |          |  |        |        |                 |  |  |        |
| Control                      | <0.0001                                                                                                                                                                                                                                                                                                                              | <0.0001                    | <0.0001                     |                 |                  |         |        |         |         |          |  |        |        |                 |  |  |        |                                                                                                                                                                                                                                                                                                                                  |                  |          |                 |                  |         |        |         |        |          |  |        |        |                 |  |  |        |                                                                                                                                                                                                                                                                                                                                          |                  |          |                 |                  |         |         |         |         |          |  |        |        |                 |  |  |        |
| Ablation                     |                                                                                                                                                                                                                                                                                                                                      | 0.9730                     | 0.2262                      |                 |                  |         |        |         |         |          |  |        |        |                 |  |  |        |                                                                                                                                                                                                                                                                                                                                  |                  |          |                 |                  |         |        |         |        |          |  |        |        |                 |  |  |        |                                                                                                                                                                                                                                                                                                                                          |                  |          |                 |                  |         |         |         |         |          |  |        |        |                 |  |  |        |
| Control passive              |                                                                                                                                                                                                                                                                                                                                      |                            | 0.4015                      |                 |                  |         |        |         |         |          |  |        |        |                 |  |  |        |                                                                                                                                                                                                                                                                                                                                  |                  |          |                 |                  |         |        |         |        |          |  |        |        |                 |  |  |        |                                                                                                                                                                                                                                                                                                                                          |                  |          |                 |                  |         |         |         |         |          |  |        |        |                 |  |  |        |
