# Supplementary material for: Adult-born neurons facilitate olfactory bulb pattern separation during task engagement
Source: eLife journal article supplement (doi:10.7554/elife.33006), 2018-03-13
Supplement: supp [file elife-33006-supp-v1.zip]

Archive with 6 entries (6 files):
- elife_poa_e33006_Figure_2_figure_supplement_1.pdf
- elife_poa_e33006_Transparent_Reporting_File.pdf
- elife_poa_e33006_Figure_4_figure_supplement_1.pdf
- elife_poa_e33006_Figure_7_figure_supplement_1.pdf
- elife_poa_e33006_Figure_3_figure_supplement_1.pdf
- elife_poa_e33006_Figure_1_figure_supplement_1.pdf
