# Supplementary figures and images for: Adult-born neurons facilitate olfactory bulb pattern separation during task engagement
Source: eLife journal article supplement (doi:10.7554/elife.33006), 2018-03-13

Figure 4-figure supplement 1

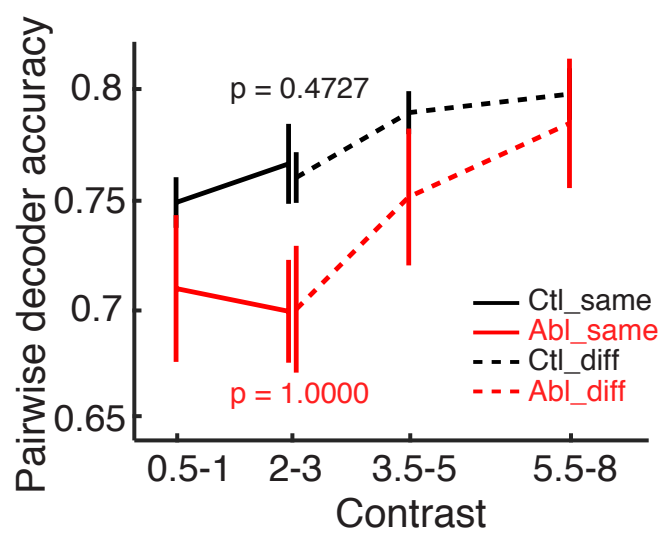

Supplement: supp [file elife-33006-supp-v1.zip]

Figure 3-figure supplement 1

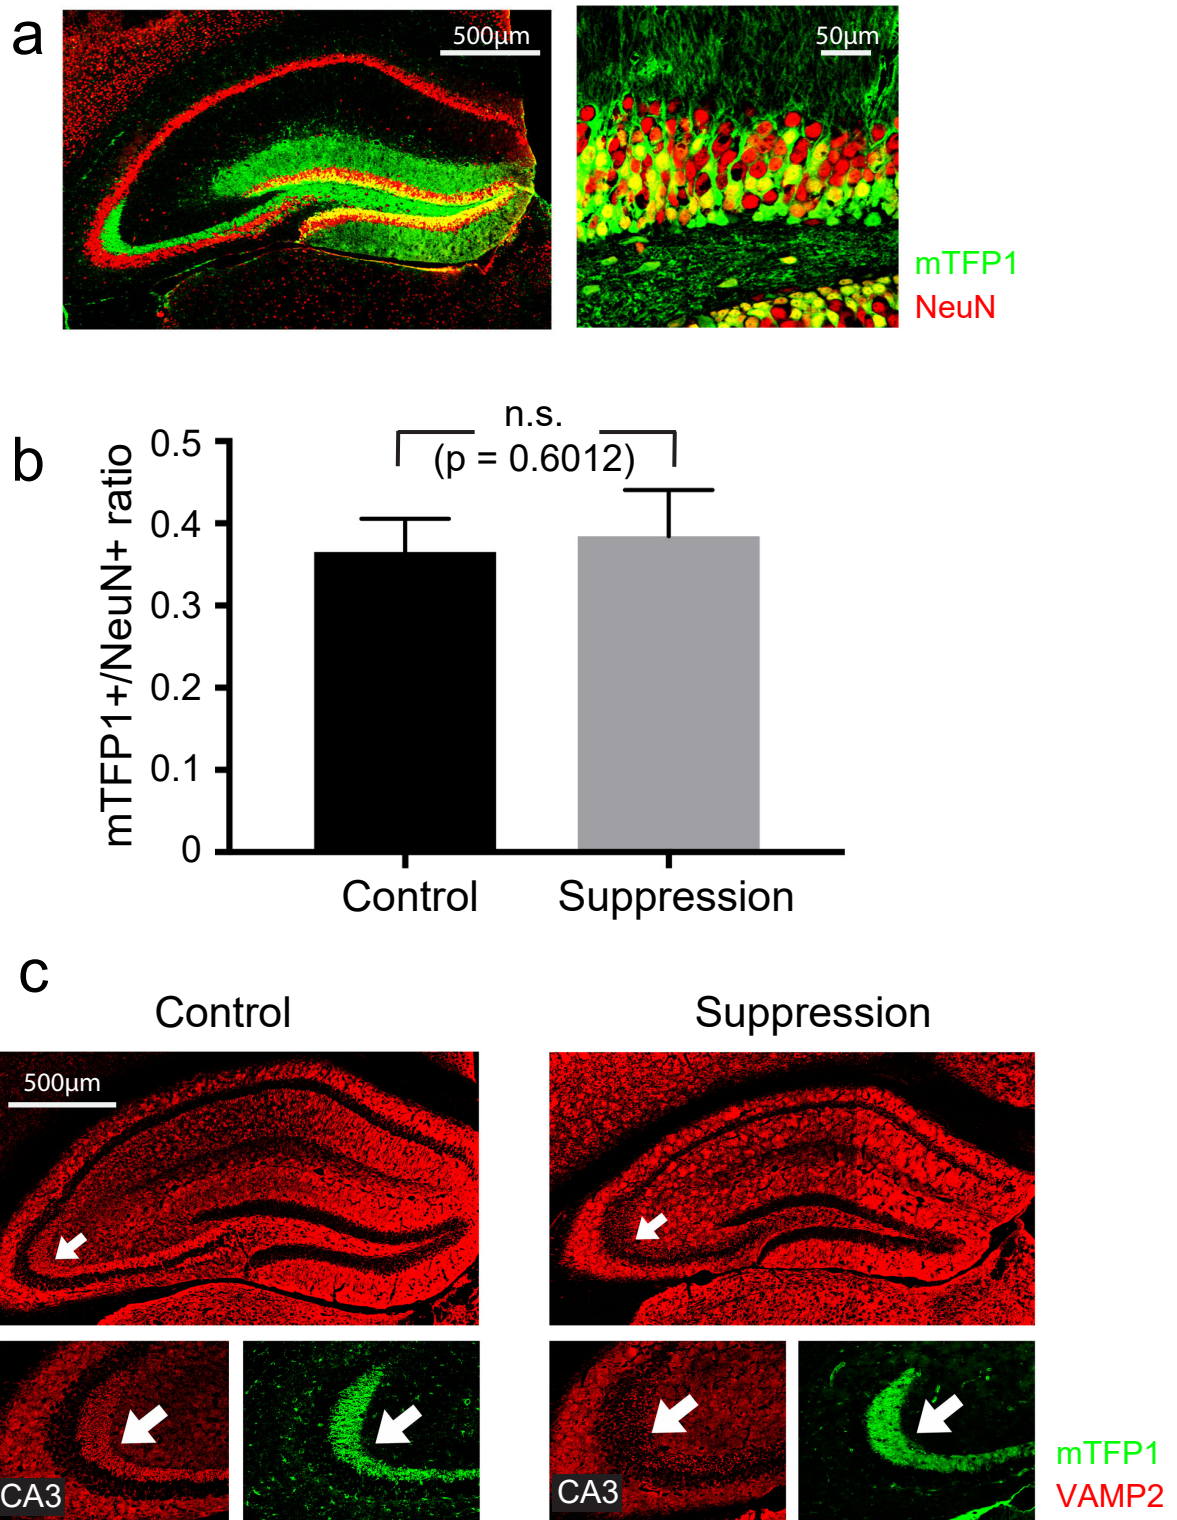

Supplement: supp [file elife-33006-supp-v1.zip]

Figure 2-figure supplement 1

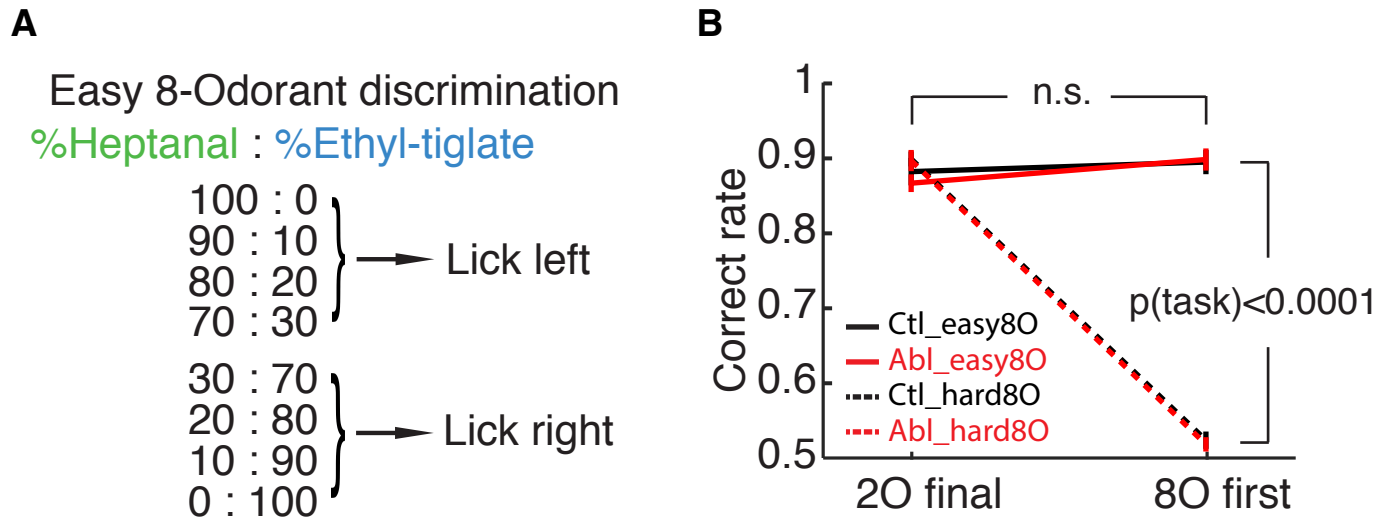

Supplement: supp [file elife-33006-supp-v1.zip]

Figure 1-figure supplement 1

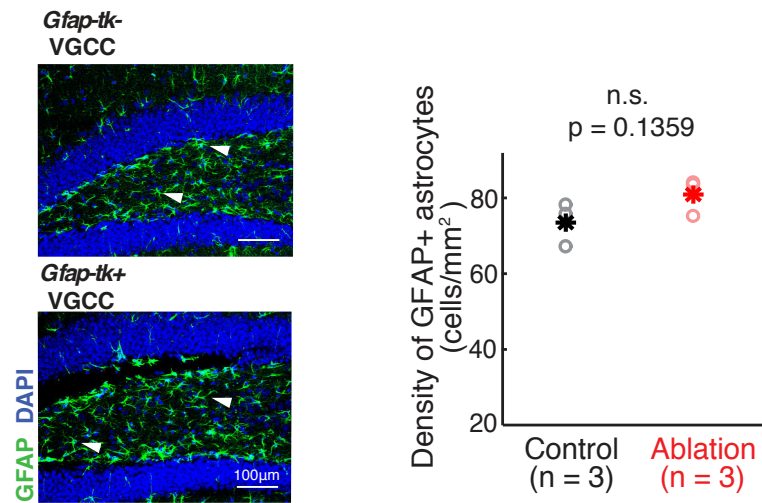

Supplement: supp [file elife-33006-supp-v1.zip › elife_poa_e33006_Figure_1_figure_supplement_1.pdf]
